# Supplementary material
Source: MDPI journal article supplement (https://www.mdpi.com/2073-4344/7/7/220)
Supplement: s1 [file s1]

# Supplementary Materials: Electroreduction of CO<sub>2</sub> into Ethanol over an Active Catalyst: Copper Supported on Titania

Jing Yuan, Li Liu, Rong-Rong Guo, Sheng Zeng, Huan Wang \* and Jia-Xing Lu \*

## 2. Results and Discussion

### 2.1. Performance Comparison of Different Cu-Supported TiO<sub>2</sub> Catalysts

EDX analysis of Cu/TiO<sub>2</sub> catalysts

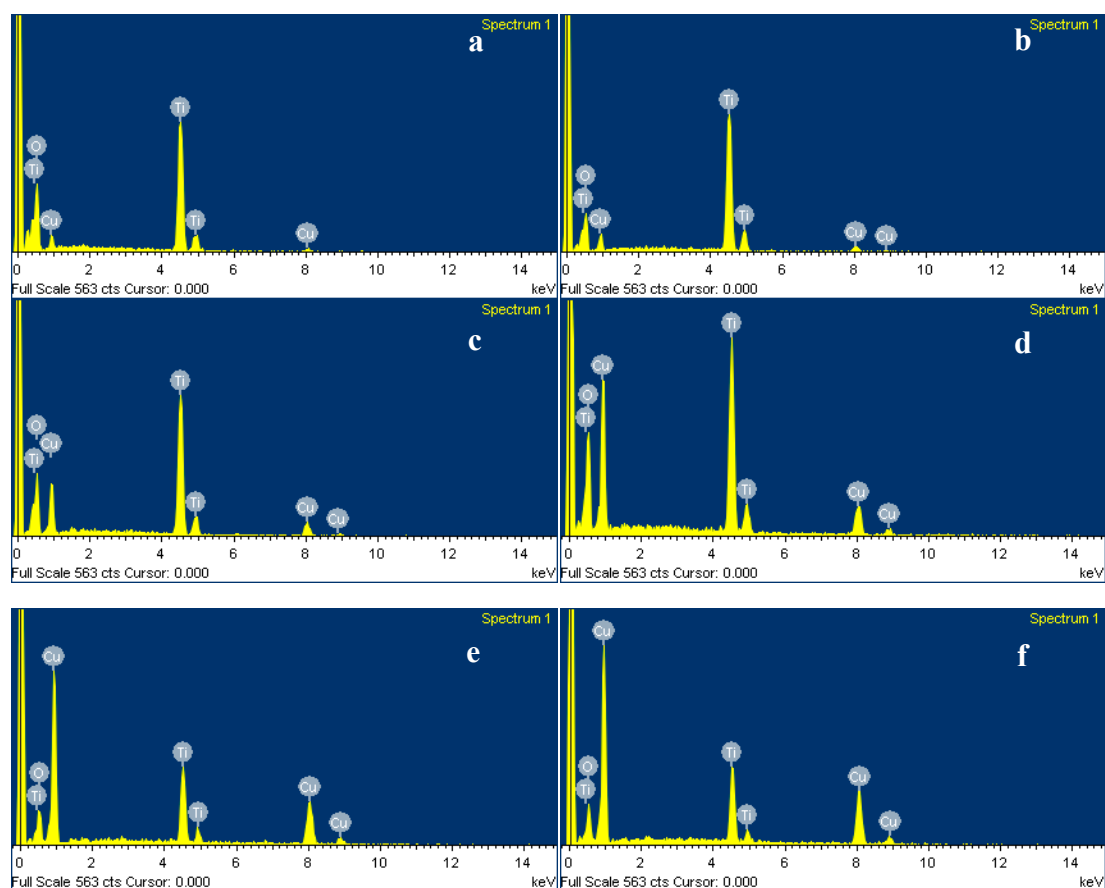

**Figure S1.** The EDX spectrums of Cu/TiO<sub>2</sub>: (a) 5 wt % Cu/TiO<sub>2</sub>, (b) 10 wt % Cu/TiO<sub>2</sub>, (c) 20 wt % Cu/TiO<sub>2</sub>, (d) 40 wt % Cu/TiO<sub>2</sub>, (e) 60 wt % Cu/TiO<sub>2</sub>, and (f) 80 wt % Cu/TiO<sub>2</sub>.

SEM Analysis of Cu/TiO<sub>2</sub> Catalysts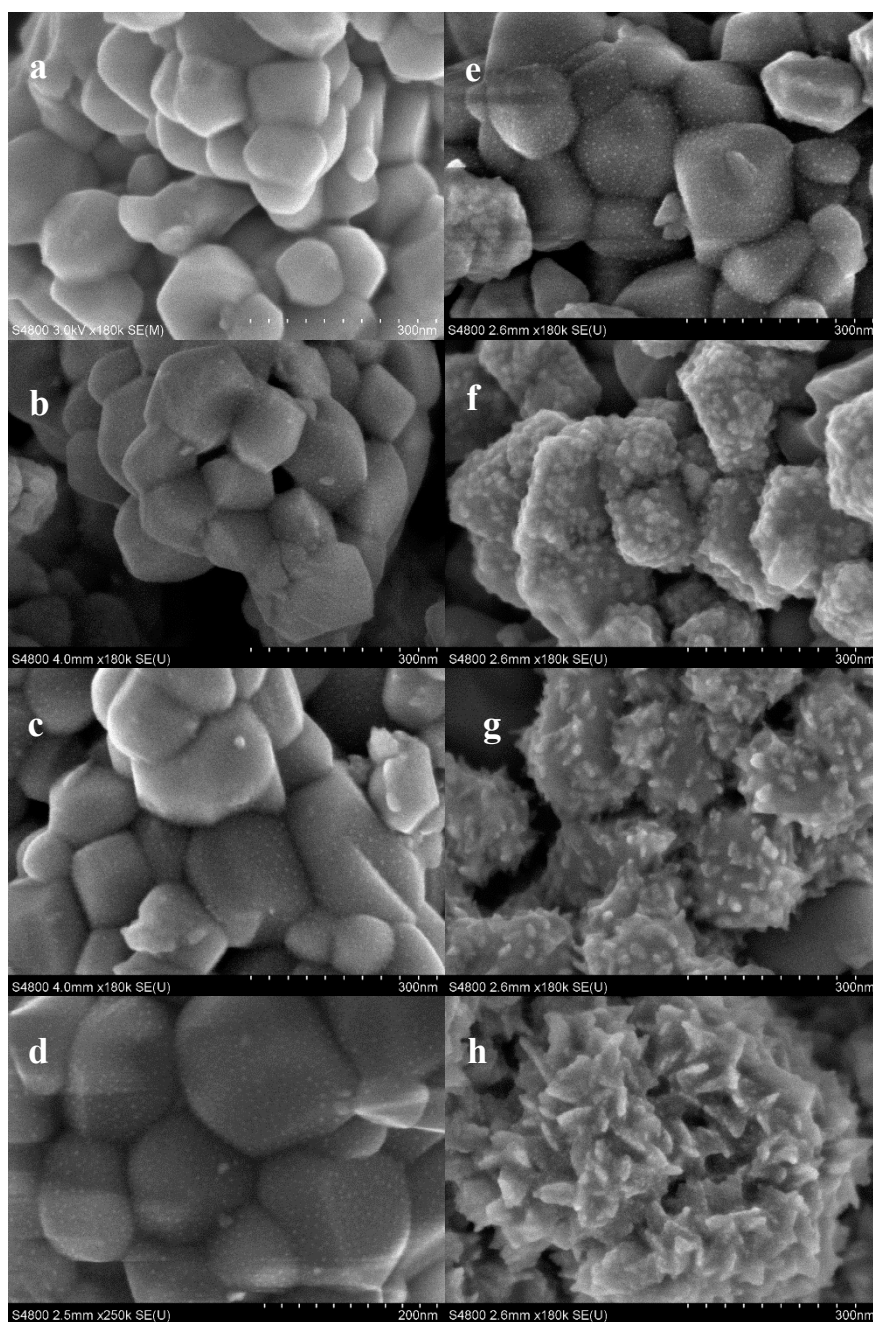

**Figure S2.** SEM images of (a) pure TiO<sub>2</sub>, (b) 5 wt % Cu/TiO<sub>2</sub>, (c) 10 wt % Cu/TiO<sub>2</sub>, (d) 20 wt % Cu/TiO<sub>2</sub>, (e) 40 wt % Cu/TiO<sub>2</sub>, (f) 60 wt % Cu/TiO<sub>2</sub>, (g) 80 wt % Cu/TiO<sub>2</sub>, and (h) pure Cu NPs.

## 2.2. Catalyst Activity in a Standard Three-Electrode Cell

the Material Characterization of 40 wt % Cu/C

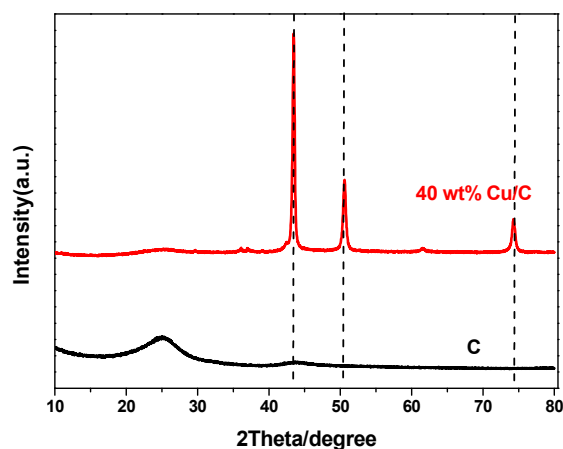

**Figure S3.** XRD pattern of pure C (black line) and 40 wt % Cu/C (red line)

40 wt % Cu/C was synthesized by the similar method. From Figure S3, it demonstrates that desired 40 wt % Cu/C materials were successfully fabricated, and all the diffraction peaks of the one were well indexed to the hybrid of Cu and C phase, of which the significant characteristic diffraction peaks for Cu NPs were represented by the dash lines.

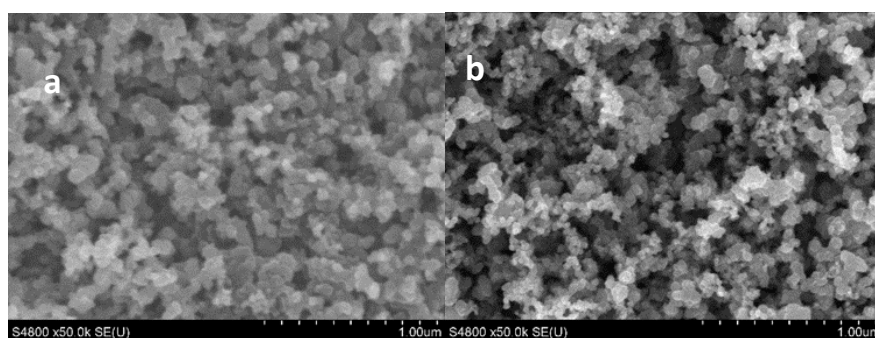

**Figure S4.** SEM images of pure C (a) and 40 wt % Cu/C (b).

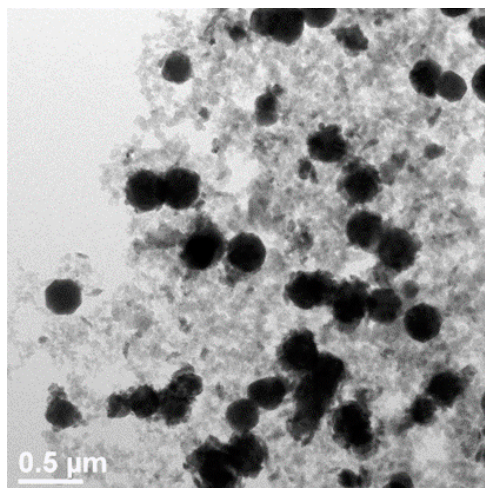

**Figure S5.** TEM images of 40 wt % Cu/C.

Figure S4 presents the SEM image of 40 wt % Cu/C and pure C. It can be found that there is no ability to distinguish the Cu and C, but from TEM image of 40 wt % Cu/C in Figure S5, obvious Cu NPs with an average size of about 200 nm were loaded on the surface of C. It reconfirmed that TiO<sub>2</sub> assists to create and stabilize small and well-dispersed Cu NPs

### 2.3. The Electrocatalytic Activity of Various Cu/TiO<sub>2</sub>

#### Gas Chromatograms of Product Solution

The GC dates were obtained with gas chromatography-flame ionization detector (GC-FID) (SHIMADZU, GC-2014C) and manual injection of 1 µL of reaction solution. The peak at about 6.7 min was verified as ethanol by comparison to standard solutions. The produce of n-propanol and the internal standard substance isopropanol have very different retention times, at around 10.2 min and 9.8 min, respectively. Sometimes, trace methanol, which is not discussed in the paper for its little amount, could be detected at ca 4.2 min.

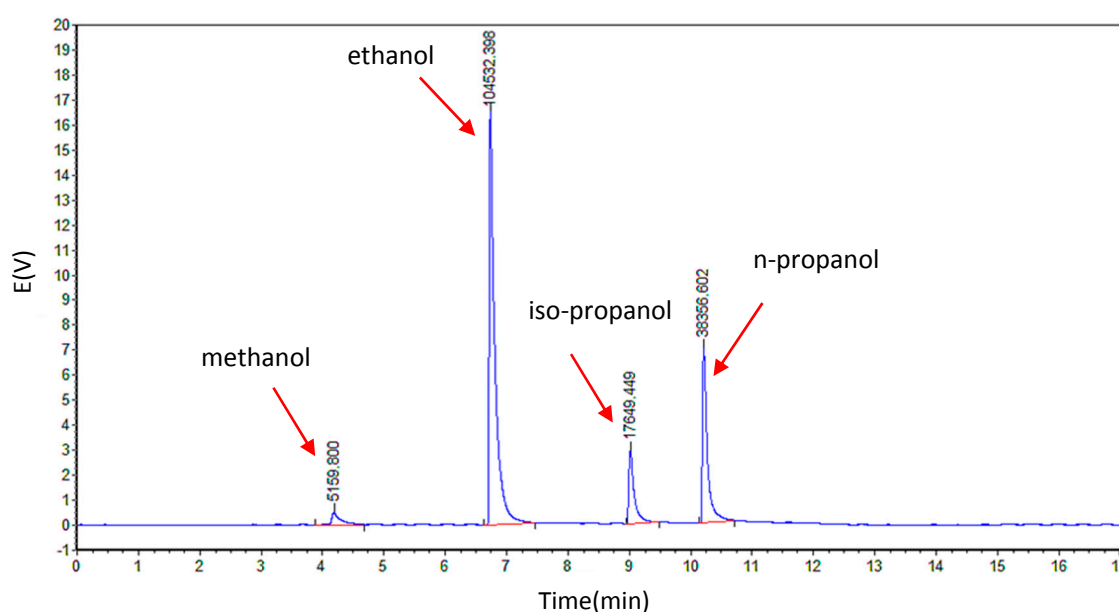

**Figure S6.** Gas chromatogram of product solution after a certain time bulk electrolysis of 0.2 M KI solution saturated with CO<sub>2</sub> at a constant cathodic potential.

The Faradaic efficiency for a specific product is calculated according to the following equation:

$$FE = \frac{z \cdot n \cdot F}{Q} \quad (1)$$

where  $z$  is the theoretical number of  $e^-$  exchanged to form the desired product,  $n$  is the number of moles produced,  $F$  is the Faraday constant ( $F = 96485 \text{ C/mol}$ ), and  $Q$  is the total charge applied in the process.

#### TEM Histograms of Cu/TiO<sub>2</sub> Catalysts

The average Cu particle size of the Cu/TiO<sub>2</sub> catalysts is below 20 nm. TEM histograms of Cu particle size distribution from the Cu/TiO<sub>2</sub> catalysts are shown in Figure S4. As the express of the electrolysis experiment, the 60 wt % Cu/TiO<sub>2</sub> catalyst exhibits more serious agglomeration than 40 wt % Cu/TiO<sub>2</sub> catalyst.

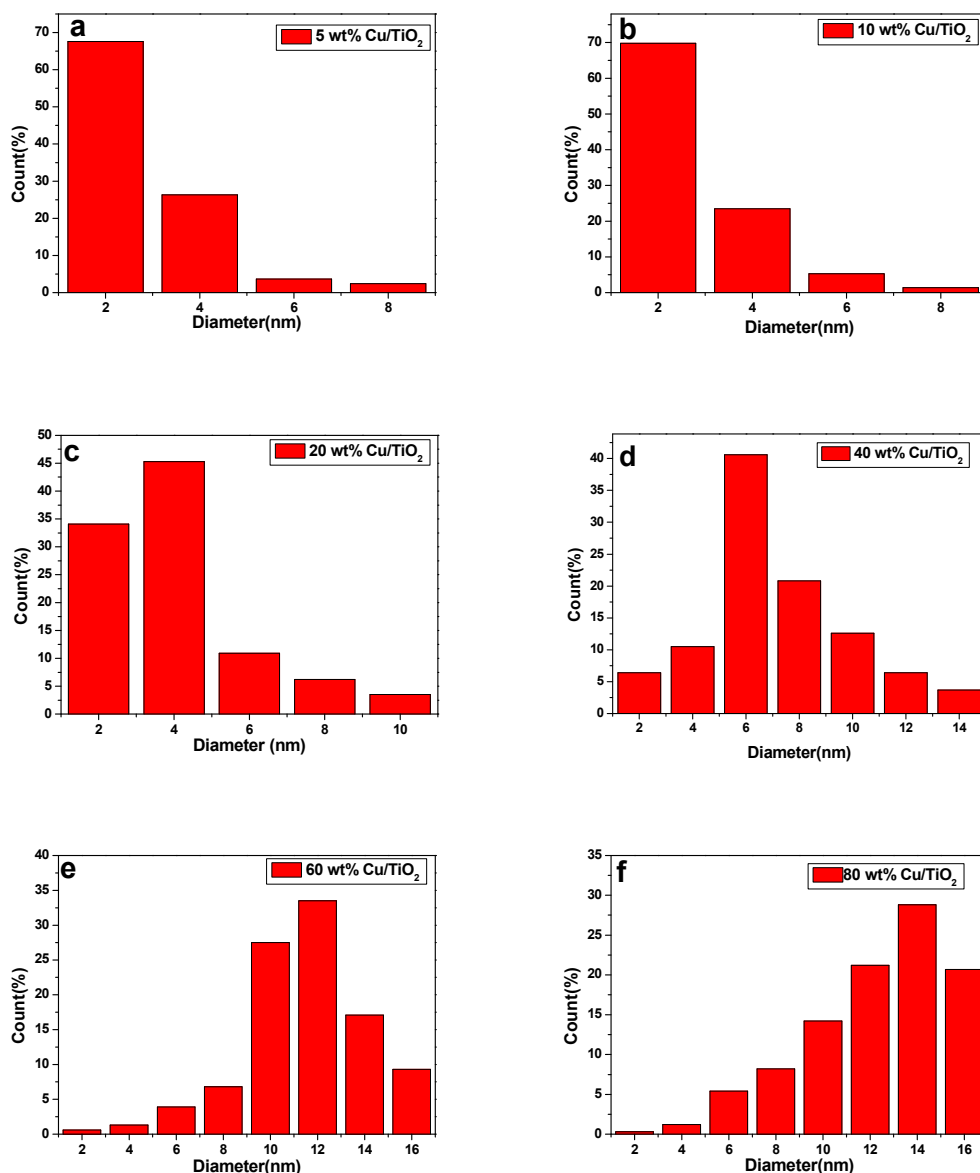

**Figure S7.** TEM histograms of the Cu particle size distribution from: (a) 5 wt % Cu/TiO<sub>2</sub>, (b) 10 wt % Cu/TiO<sub>2</sub>, (c) 20 wt % Cu/TiO<sub>2</sub>, (d) 40 wt % Cu/TiO<sub>2</sub>, (e) 60 wt % Cu/TiO<sub>2</sub>, and (f) 80 wt % Cu/TiO<sub>2</sub>.

### Electrochemistry Surface Area (ECSA) Test

In order to test the active surface of various Cu/TiO<sub>2</sub> samples, the double layer capacitance in N<sub>2</sub>-saturated 0.5 M H<sub>2</sub>SO<sub>4</sub> was measured by CV in a potential range from 0.35 V to 0.10 V vs. SCE without faradaic process occurred. The scan rates ( $\nu$ ) were 20 mV/s, 40 mV/s, 60 mV/s, 80 mV/s, and 100 mV/s, respectively. The double layer capacitance ( $C_{dl}$ ) was calculated by measuring the capacitive current associated with double-layer charging from the scan-rate dependence of CV stripping. ECSA was estimated from the ratio of  $C_{dl}$  for the working electrode and the corresponding smooth metal electrode, if  $C_s$  the average C of smooth metal Cu surface ( $C_s$ ) is 20  $\mu\text{F}/\text{cm}^2$  [1], that is,  $\text{ECSA} = C_{dl}/C_s$ . Additionally, the  $C_{dl}$  was estimated by plotting the cathodic current ( $I_c$ ) at  $-0.25$  V vs. SCE against the scan rate ( $C_{dl} = I_c/\nu$ ). As shown in Figure S8, CV curves are recorded for various Cu/TiO<sub>2</sub> and 40 wt% Cu/C samples, different samples exhibit different  $C_{dl}$  and ECSA (summarized in Table S1).

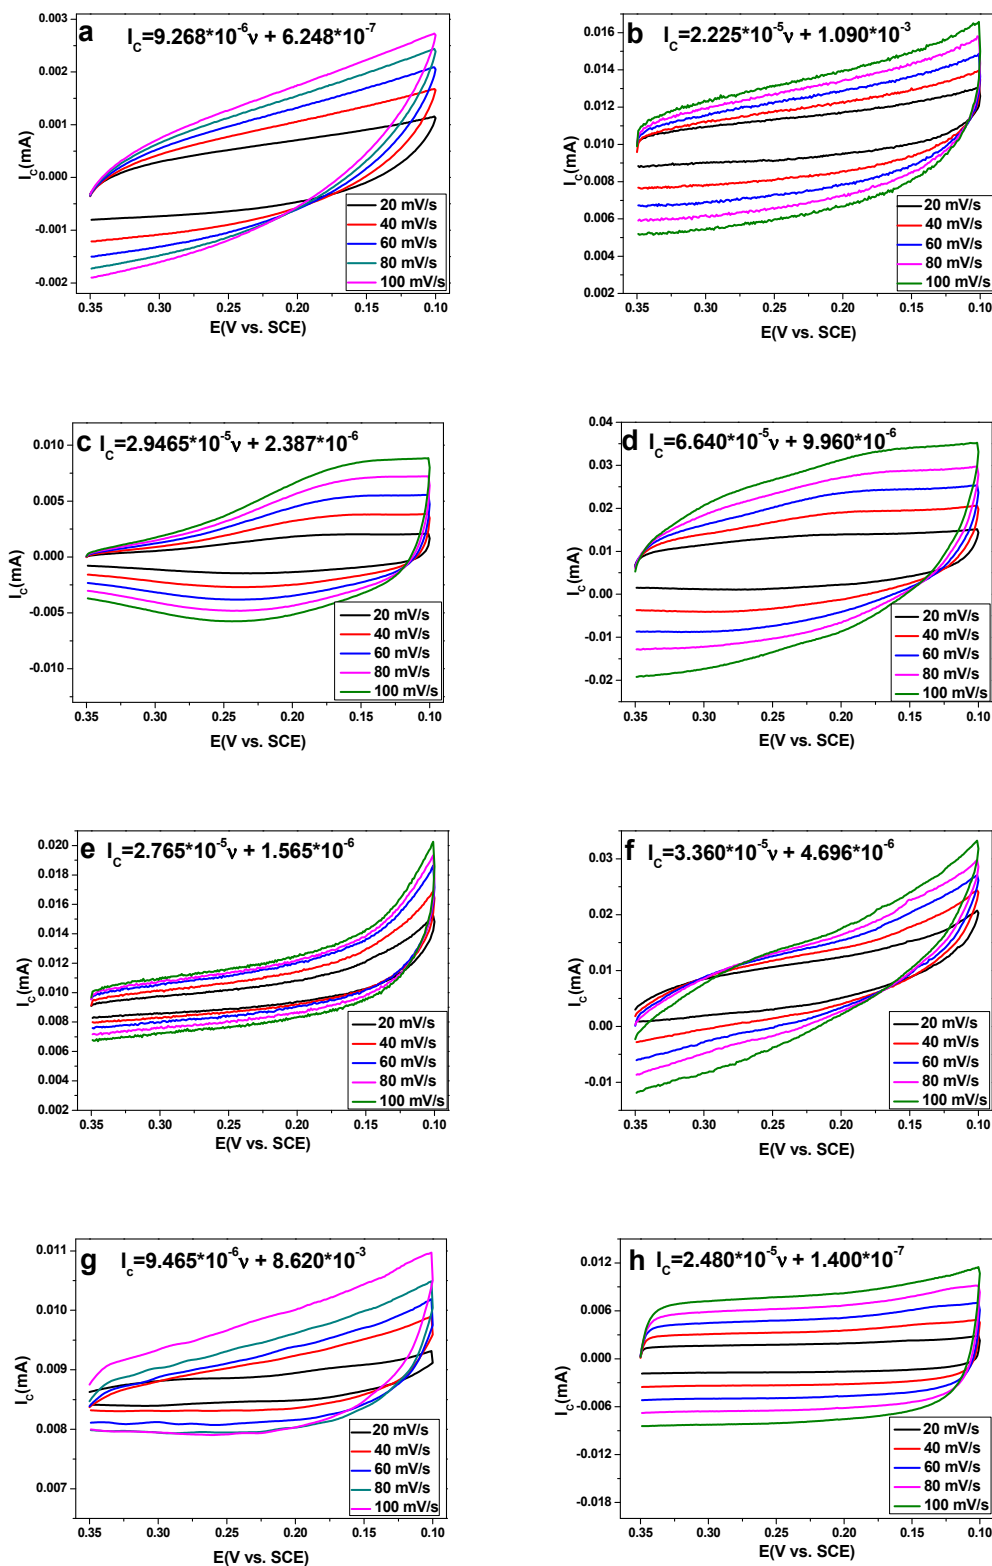

**Figure S8.** CVs in the capacitance current range (from 0.35 to 0.10 V vs. SCE) with (a) 5 wt % Cu/TiO<sub>2</sub>; (b) 10 wt % Cu/TiO<sub>2</sub>; (c) 20 wt % Cu/TiO<sub>2</sub>; (d) 40 wt % Cu/TiO<sub>2</sub>; (g) 60 wt % Cu/TiO<sub>2</sub>; (f) 80 wt % Cu/TiO<sub>2</sub>; (g) pure Cu NPs, and (h) 40 wt % Cu/C in N<sub>2</sub>-saturated 0.5 M H<sub>2</sub>SO<sub>4</sub> solution.



**Table S1.** The analysis of ECSA and  $J_{\text{ECSA}}$  for ethanol and n-propanol on various Cu/TiO<sub>2</sub> and 40 wt % Cu/C catalysts

| Catalyst                    | $C_{\text{dl}}$<br>( $\mu\text{F}$ ) | ECSA <sup>a</sup><br>( $\text{cm}^2$ ) | $J_{\text{ECSA}}$ ( $\text{mA}/\text{cm}^2$ ) |            |
|-----------------------------|--------------------------------------|----------------------------------------|-----------------------------------------------|------------|
|                             |                                      |                                        | ethanol                                       | n-propanol |
| 5 wt % Cu/TiO <sub>2</sub>  | 9.268                                | 0.46                                   | 0.25                                          | 0.16       |
| 10 wt % Cu/TiO <sub>2</sub> | 22.25                                | 1.11                                   | 0.54                                          | 0.24       |
| 20 wt % Cu/TiO <sub>2</sub> | 29.46                                | 1.47                                   | 0.64                                          | 0.25       |
| 40 wt % Cu/TiO <sub>2</sub> | 66.40                                | 3.32                                   | 2.37                                          | 0.54       |
| 60 wt % Cu/TiO <sub>2</sub> | 27.65                                | 1.38                                   | 0.57                                          | 0.33       |
| 80 wt % Cu/TiO <sub>2</sub> | 33.60                                | 1.68                                   | 0.85                                          | 0.39       |
| pure Cu NPs                 | 9.465                                | 0.47                                   | 0.21                                          | 0.13       |
| 40 wt % Cu/C                | 24.80                                | 1.24                                   | 0.57                                          | 0          |

<sup>a</sup> Geometric area is 1  $\text{cm}^2$ .

## 2.4. Electrocatalytic Characterization

### SEM Analysis of 40 wt % Cu/TiO<sub>2</sub> Electrodes

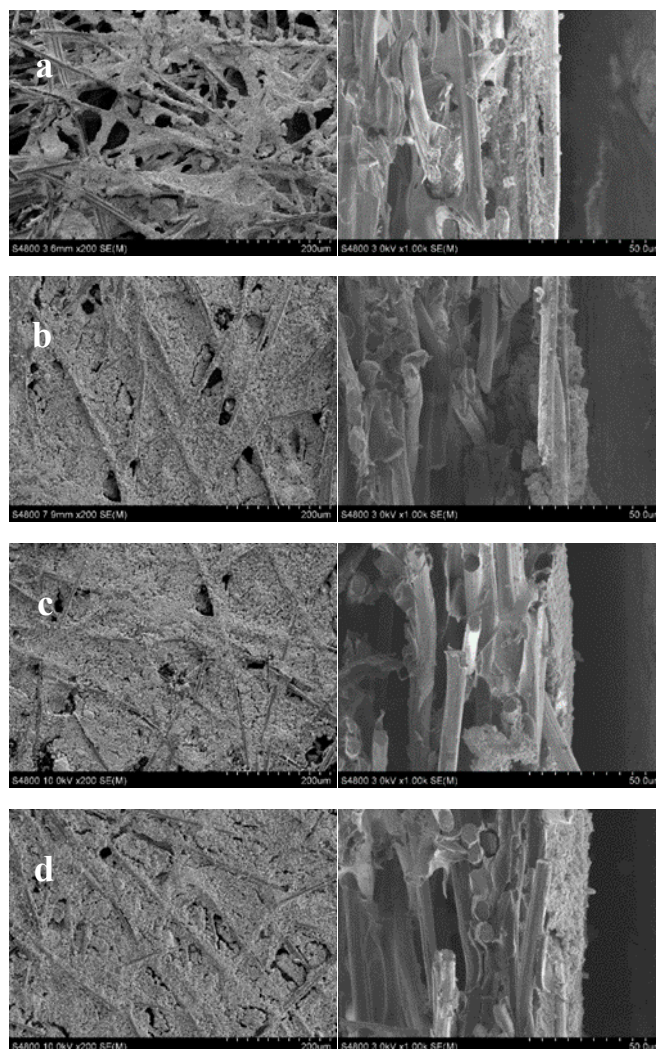

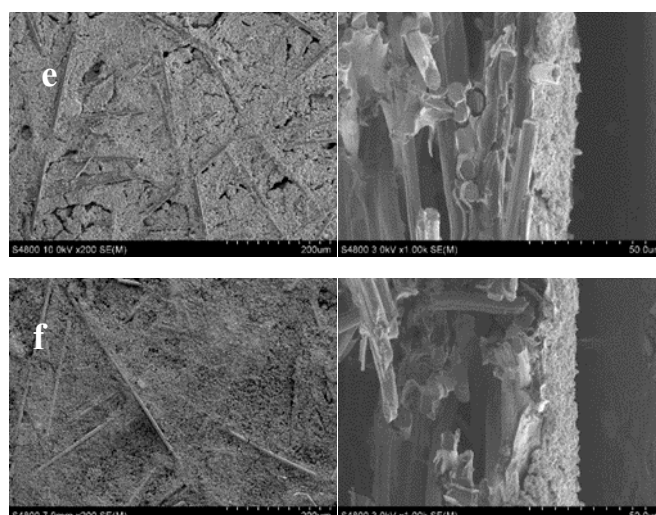

**Figure S9.** SEM images of the 40 wt % Cu/TiO<sub>2</sub> electrodes containing: (a) 0.5, (b) 1, (c) 2, (d) 3, (e) 4, and (f) 5 mg/cm<sup>2</sup>.

Comparison the SEM Images before and after 25 h Reaction

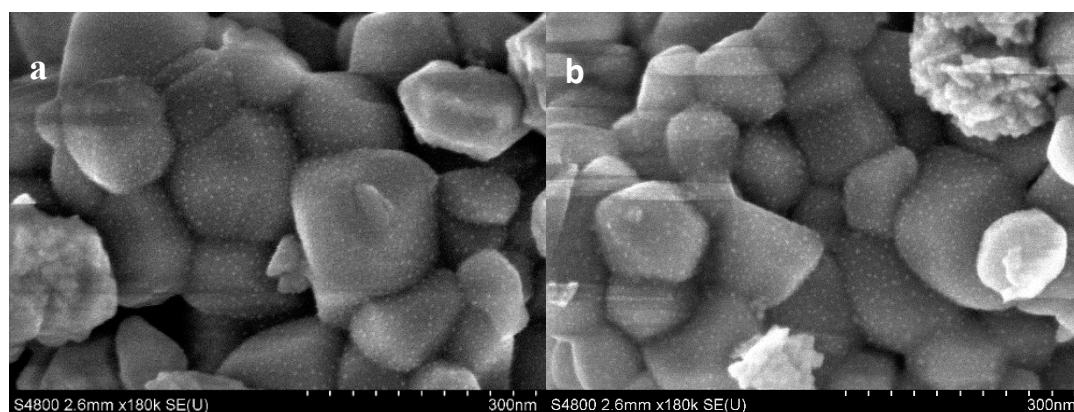

**Figure S10.** SEM images of 40 wt % Cu/TiO<sub>2</sub> (a) before and (b) after 25 h CO<sub>2</sub> electrochemical reduction.

## Reference

Gao, S.; Lin, Y.; Jiao, X.C.; Sun, Y.F.; Luo, Q.Q.; Zhang, W.H.; Li, D.Q.; Yang, J.L.; Xie, Y. Partially oxidized atomic cobalt layers for carbon dioxide electroreduction to liquid fuel. *Nature* **2016**, *529*, 68–71.
